# Supplementary material for: Improving the performance of portable aerosol size spectrometers for building dense monitoring networks
Source: Royal Society of Chemistry journal article supplement (doi:10.1039/d2ea00163b), 2022-12-28
Supplement: d2ea00163b1.pdf [file d2ea00163b1.pdf]

# Supplementary Information

## Improving the performance of portable aerosol size spectrometers for building dense monitoring networks

Yiran Li, Jiming Hao and Jingkun Jiang\*

State Key Joint Laboratory of Environment Simulation and Pollution Control, School of Environment, Tsinghua University, Beijing, 100084, China

\*To whom correspondence should be addressed: jiangjk@tsinghua.edu.cn

### 1. Measurement of the combined factor of the transfer function, CPC detection efficiency, and penetration efficiency of the modified NanoScan SMPS

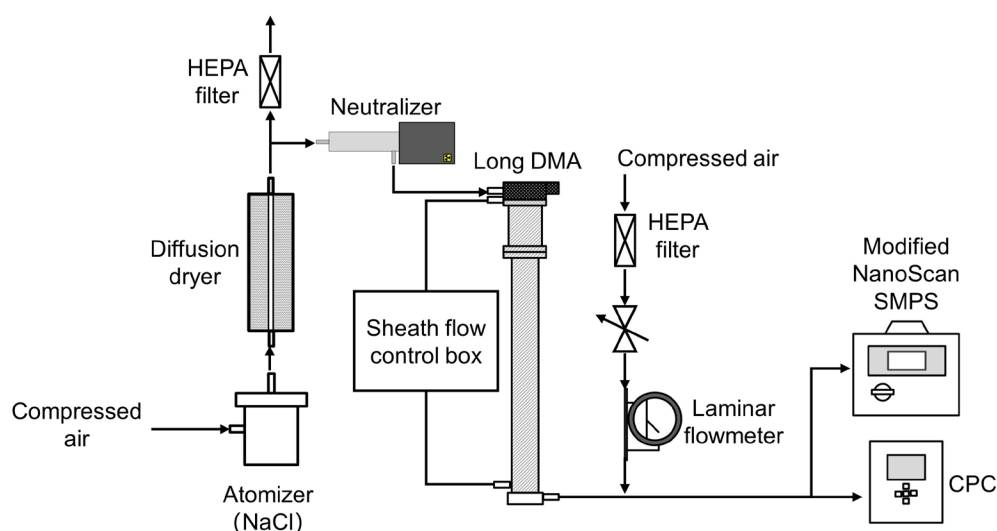

**Figure S1.** Instrument setup for measuring the combined factor of the transfer function, CPC detection efficiency, and penetration efficiency of the modified NanoScan SMPS

Retrieving the inverted PNSDs measured by the modified NanoScan SMPS requires a data inversion routine similar to those of the SMPS, but the transfer function, CPC detection efficiency, and penetration efficiency need to be measured first. In this study, we used the instrument set-up as shown in Figure S1 to measure the combined factor of them. This is similar to the Tandem DMA method and an iterative deconvolution procedure is used to analyze the data.<sup>1</sup> Polydisperse NaCl aerosols generated by a home-made collision atomizer with a dryer are conditioned by a soft X-ray charger (Model 3087, TSI corp.) and then classified with a long DMA (Model 3081, TSI corp.). The classified monodisperse aerosols are then split and the modified NanoScan SMPS and a CPC (Model 3772, TSI corp.) are measured in parallel. During each measurement period, the voltage of the long DMA was fixed and the voltage of the radial DMA on the modified NanoScan SMPS would scan for 120 seconds. The scan would repeat four times for each selected size. The measured concentrations by CPC are denoted as  $N_1$  and averaged values during each scan were used. The number concentrations from the modified NanoScan SMPS are denoted as  $N_2$ . The ratio between  $N_1$  and  $N_2$  can be expressed by the transfer functions of the long DMA and the radial DMA as follows:<sup>2</sup>

$$\frac{N_2}{N_1} = \frac{\int_{Z_{p1}^* - \Delta Z_{p1}}^{Z_{p1}^* + \Delta Z_{p1}} \Omega_1(Z_p, Z_{p1}^*) \cdot \Omega_2(Z_p, Z_{p2}^*) \cdot \eta_{\text{CPC}}(Z_{p2}^*) \cdot \eta_{\text{pene}}(Z_{p2}^*) dZ_p}{\int_{Z_{p1}^* - \Delta Z_{p1}}^{Z_{p1}^* + \Delta Z_{p1}} \Omega_1(Z_p, Z_{p1}^*) dZ_p} \quad (\text{S1})$$

where  $\Omega_1(Z_p, Z_{p1}^*)$  and  $\Omega_2(Z_p, Z_{p2}^*)$  are the transfer functions of the long DMA and the radial DMA, respectively.  $Z_{p1}^*$  is the electrical mobility of the particles classified by long DMA and  $Z_{p2}^*$  is the central electrical mobility of the particles measured by radial DMA;  $\Delta Z_{p1}$  is the half-width of  $\Omega_1(Z_p, Z_{p1}^*)$ .  $\eta_{\text{CPC}}(Z_{p2}^*)$  is the CPC detection efficiency (on the NanoScan SMPS) for particles with electrical mobility of  $Z_{p2}^*$ , and  $\eta_{\text{pene}}(Z_{p2}^*)$  is the penetration efficiency through the modified NanoScan SMPS for particles with electrical mobility of  $Z_{p2}^*$ , both of which are assumed to be constant between  $Z_{p1}^* - \Delta Z_{p1}$  to  $Z_{p1}^* + \Delta Z_{p1}$ . Here we use triangular-shaped transfer functions for both DMAs:<sup>1, 3</sup>

$$\Omega_1(Z_p, Z_{p1}^*) = \frac{\alpha_1}{2\beta_1} \left( \left| \frac{Z_{p1}^*}{Z_p} - (1 + \beta_1) \right| + \left| \frac{Z_{p1}^*}{Z_p} - (1 - \beta_1) \right| - 2 \left| \frac{Z_{p1}^*}{Z_p} - 1 \right| \right) \quad (\text{S2})$$

$$\Omega_2(Z_p, Z_{p2}^*) = \frac{\alpha_2}{2\beta_2} \left( \left| \frac{Z_{p2}^*}{Z_p} - (1 + \beta_2) \right| + \left| \frac{Z_{p2}^*}{Z_p} - (1 - \beta_2) \right| - 2 \left| \frac{Z_{p2}^*}{Z_p} - 1 \right| \right) \quad (\text{S3})$$

where  $\alpha_1$  and  $\alpha_2$  are the heights of the transfer functions of long DMA and radial DMA, and  $\beta_1$  and  $\beta_2$  are the half-widths of the transfer functions of long DMA and radial DMA. A combined factor of the transfer function, CPC detection efficiency, and penetration efficiency of the modified NanoScan SMPS are defined as:

$$\Omega_2'(Z_p, Z_{p2}^*) = \frac{\alpha_2'}{2\beta_2} \left( \left| \frac{Z_{p2}^*}{Z_p} - (1 + \beta_2) \right| + \left| \frac{Z_{p2}^*}{Z_p} - (1 - \beta_2) \right| - 2 \left| \frac{Z_{p2}^*}{Z_p} - 1 \right| \right) \quad (\text{S4})$$

$$\alpha_2' = \eta_{\text{CPC}}(Z_{p2}^*) \cdot \eta_{\text{pene}}(Z_{p2}^*) \quad (\text{S5})$$

With the known  $\alpha_1$  and  $\beta_1$ , a deconvolution procedure based on the method of least squares is used to retrieve  $\alpha_2'$  and  $\beta_2$ .<sup>1</sup> Besides, using two identical long DMAs one can retrieve the values of  $\alpha_1$  and  $\beta_1$ , which are determined in this study to be 0.91 and 0.11, respectively. The results of  $\Omega_2'(Z_p, Z_{p2}^*)$  are shown in Fig. S2, which is incorporated in the data inversion routine described below.

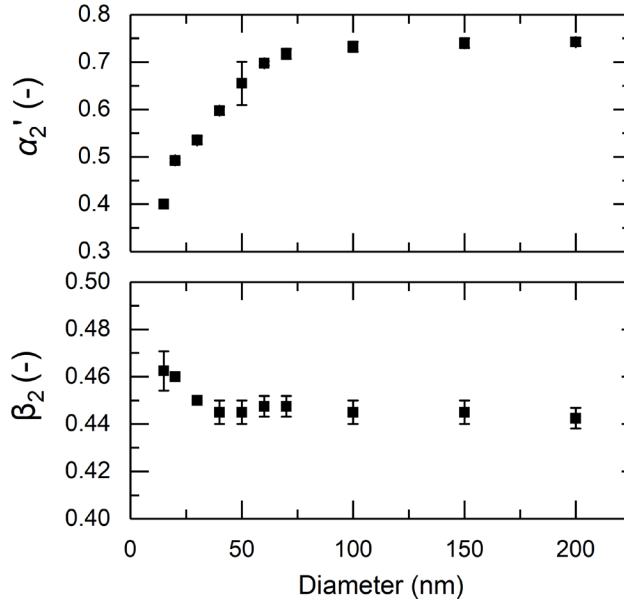

**Figure S2.** Results of the combined factor of the transfer function, CPC detection efficiency, and penetration efficiency of the modified NanoScan SMPS

## 2. Calculation of ion mobility ratio and PNSDs for the bipolar data

With the bipolar data from the reference SMPS and the modified NanoScan SMPS, the ion mobility ratio can be calculated with a formula:<sup>4</sup>

$$x = \exp[\ln(R_{d_p}^+ / R_{d_p}^-) / 2] \quad (S6)$$

where  $R_{d_p}^+$  and  $R_{d_p}^-$  are the raw concentrations of positively and negatively charged particles in the size of  $d_p$  ( $\text{cm}^{-3}$ ).  $d_p$  is a size with little influence from larger aerosols carrying multiple charges and can be found with an empirical method.<sup>4</sup>

With the ion mobility ratios, charge fractions can be calculated:<sup>4</sup>

$$f(\pm q, d_p) = \frac{e}{\sqrt{4\pi^2 \epsilon_0 \alpha d_p k_B T}} \exp \frac{-[\pm q - \frac{2\pi \epsilon_0 \alpha d_p k_B T}{e^2} \ln(x)]^2}{2 \frac{2\pi \epsilon_0 \alpha d_p k_B T}{e^2}}$$

$$\alpha = \begin{cases} 0.9630 \times \exp(\frac{7.6019}{d_p + 2.2476}) & q = 1 \\ 0.9826 + 0.9435 \exp(-0.0478 d_p) & q = 2 \\ 1 & q \geq 3 \end{cases} \quad (S7)$$

where  $f(\pm q, d_p)$  is the fraction of size  $d_p$  particles carrying  $\pm q$  elementary charges (dimensionless);  $e$  is the elementary charge (C);  $\epsilon_0$  is the permittivity of vacuum ( $\text{C}^2 \cdot \text{N}^{-1} \cdot \text{m}^{-2}$ );  $k_B$  is the Boltzmann's constant ( $\text{J} \cdot \text{K}^{-1}$ );  $T$  is the temperature (K);  $\alpha$  is the correction coefficient (dimensionless).

The relationship between measured raw concentrations and the desired concentration of aerosols that are being measured is:

$$R_{d_p} = \int_0^{\infty} N(d_p) \cdot G(i, d_p) \cdot dd_p, \quad i = 1, 2, \dots, 30 \quad (S8)$$

$$G(i, d_p) = Q_a \sum_{q=1}^{\infty} [f(+q, d_p) + f(-q, d_p)] \cdot P(q, i, d_p) \cdot dd_p \quad (S9)$$

Where  $R_{d_p}$  is the sum of  $R_{d_p}^+$  and  $R_{d_p}^-$  ( $\text{cm}^{-3}$ ),  $N(d_p)dd_p$  is the number concentration of all particles of size  $d_p$  ( $\text{cm}^{-3}$ ),  $Q_a$  is the sample flowrate ( $\text{cm}^3 \cdot \text{s}^{-1}$ ),  $P(q, i, d_p)$  is a combined factor of the transfer function of the DMA, counting efficiency of the CPC and penetration efficiency through the SMPS systems. For the reference SMPS, the transfer function of the long DMA was calculated by formula from Knutson and Whitby (1975)<sup>5</sup>, the counting efficiency of the CPC was calculated with parameters provided by the instrument manual, and penetration efficiency was calculated with the equivalent pipe length method.<sup>6</sup> For the modified NanoScan SMPS,  $P(q, i, d_p)$  was obtained with the method described above. A linear inversion algorithm was used to obtain  $N(d_p)dd_p$  from  $R_{d_p}$ .<sup>7</sup>

### 3. Calculation of parameters that characterize the PNSDs

For number concentrations in nucleation mode, Aitken mode, accumulation mode, and the whole measured size range, the specific size range for each mode is not unified but set to be different for the original NanoScan SMPS and the modified NanoScan SMPS. The reason is that using a unified size range for two instruments requires interpolation of PNSDs to the same size bins, while the original NanoScan SMPS and the modified NanoScan SMPS have different midpoints of size bins and the bins are wide, meaning that interpolation would cause extra uncertainty. Besides, PNSDs measured by the original NanoScan SMPS and the modified NanoScan SMPS are not directly compared to each other, but both with those measured by the reference SMPS. Consistency with the reference SMPS is then compared to illustrate their performance. For the original NanoScan SMPS, these size ranges are 12 - 27nm (nucleation mode), 27 - 87 nm (Aitken mode), 87 - 274 nm (accumulation mode), and 12 - 274 nm (the whole size range). For the modified NanoScan SMPS, these size ranges are 12 - 25nm (nucleation mode), 25 - 90 nm (Aitken mode), 90 - 297 nm (accumulation mode), and 12 - 297 nm (the whole size range). The PNSDs obtained by the reference SMPS are linearly interpolated to the size bin of either the original NanoScan SMPS or the modified NanoScan SMPS, depending on which one it was being compared to, and number concentrations in different modes are then integrated. The geometric mean diameter and geometric standard deviations are calculated based on the PNSDs without interpolation for the reference SMPS.

### 4. Indoor aerosols measured by the modified NanoScan SMPS and the reference SMPS

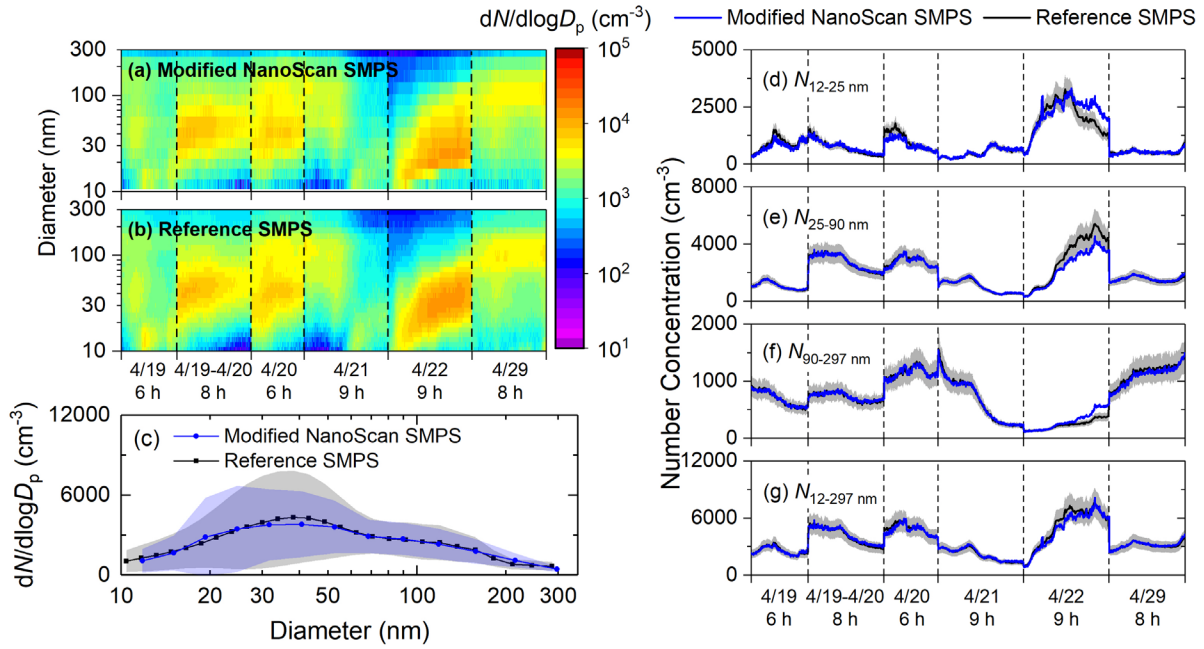

**Figure S3.** PNSDs of indoor aerosols for a total of 46 hours by (a) the modified NanoScan SMPS and (b) the reference SMPS. (c) The averaged size distributions and standard deviations during the measurement period, as denoted by line and shaded area, respectively. Integrated number concentrations in the size range of (d) 12 - 25 nm, (e) 25 - 90 nm, (f) 90 - 297 nm, (g) 12 - 297 nm of measured size distributions are shown, and the shaded area represent  $\pm 20\%$  range of the reference SMPS. The time resolution for the PNSDs and thus the calculated parameters measured by the modified NanoScan SMPS and the reference SMPS are 75 s and 5 min, respectively.

## 5. Time series of indoor and outdoor aerosols for the original NanoScan SMPS

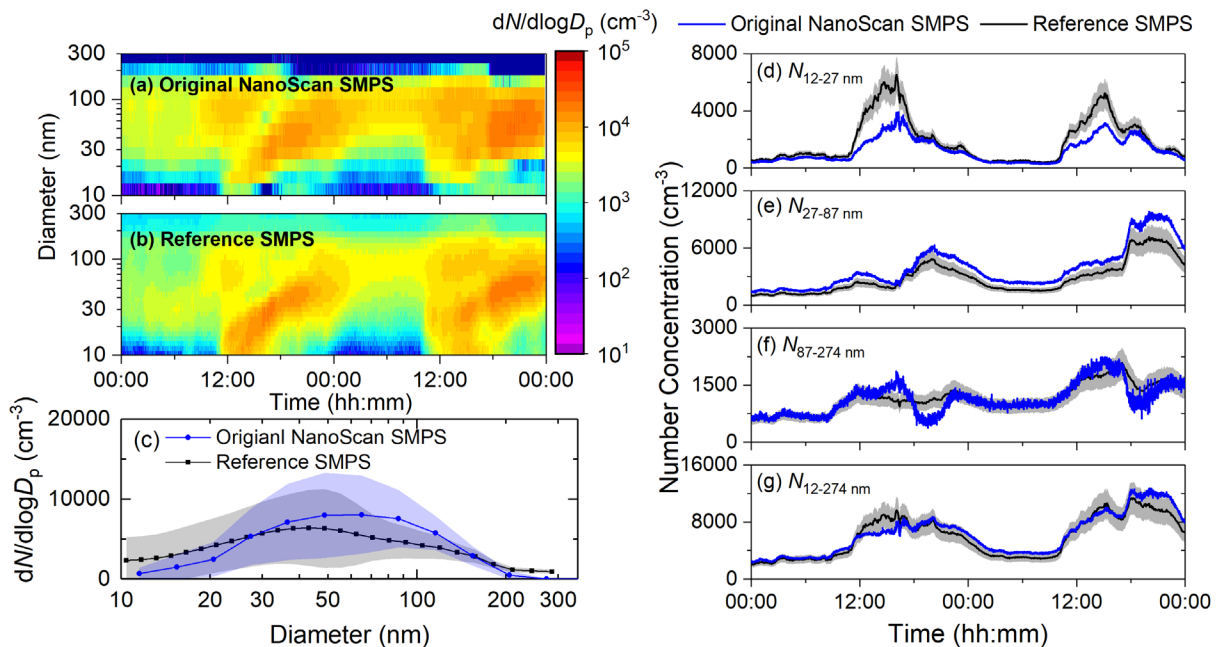

**Figure S4.** PNSDs of indoor aerosols for a total of 48 hours by (a) the original NanoScan SMPS and (b) the reference SMPS. (c) The averaged size distributions and standard deviations during the measurement period, as denoted by line and shaded area, respectively. Integrated number concentrations in the size range of (d) 12 - 27nm, (e) 27 - 87 nm, (f) 87 - 274 nm, (g) 12 - 274 nm of measured size distributions are shown, and the shaded area represent  $\pm 20\%$  range of the reference SMPS. The time resolution for the PNSDs and thus the calculated parameters measured by the original NanoScan SMPS and the reference SMPS are 1 min and 5 min, respectively.

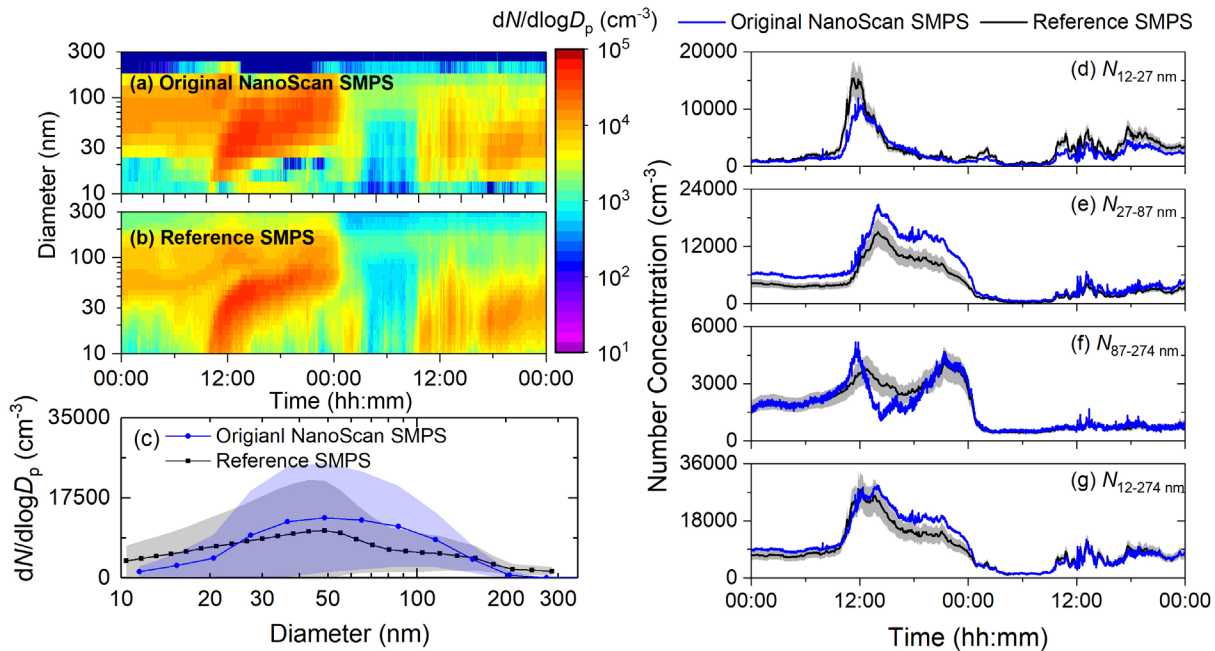

**Figure S5.** PNSDs of outdoor aerosols for a total of 48 hours by (a) the original NanoScan SMPS and (b) the reference SMPS. (c) The averaged size distributions and standard deviations during the measurement period, as denoted by line and shaded area, respectively. Integrated number concentrations in the size range of (d) 12 - 27nm, (e) 27 - 87 nm, (f) 87 - 274 nm, (g) 12 - 274 nm of measured size distributions are shown, and the shaded area represent  $\pm 20\%$  range of the reference SMPS. The time resolution for the PNSDs and thus the calculated parameters measured by the original NanoScan SMPS and the reference SMPS are 1 min and 5 min, respectively.

## 6. Scatter plots for all measuring periods using indoor and outdoor aerosols

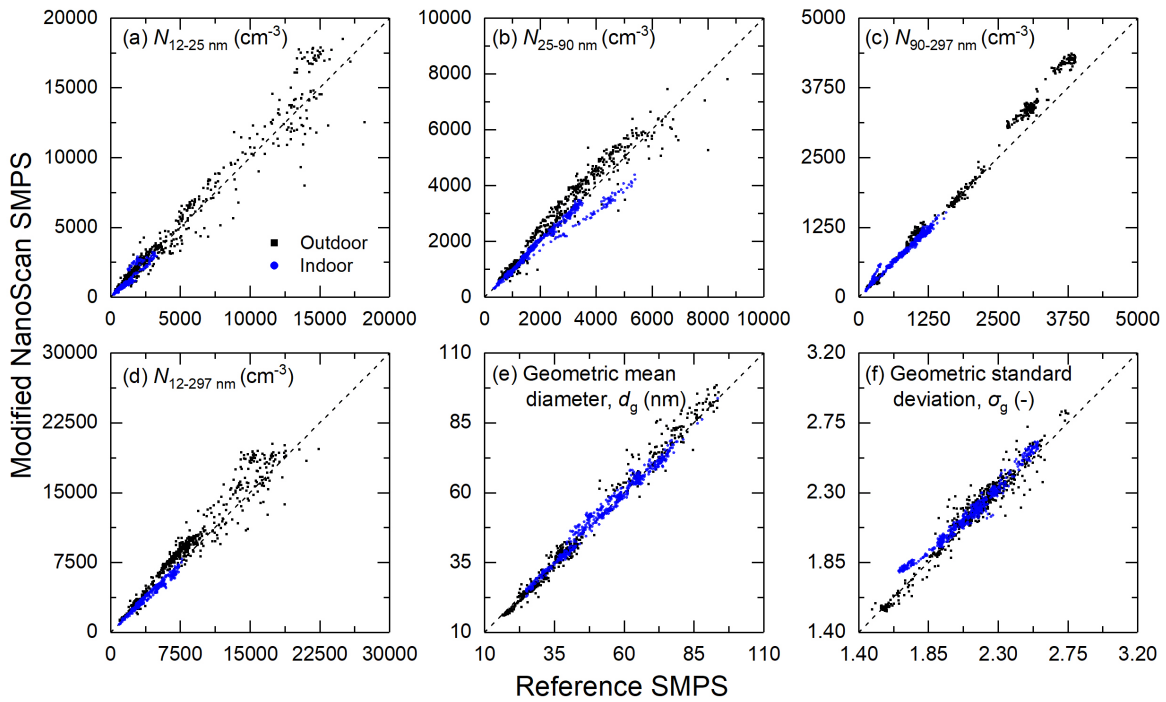

120

121 **Figure S6.** Comparing size distributions of outdoor and indoor aerosols for all measurement  
 122 periods by the reference SMPS (x-axis) and the modified NanoScan SMPS (y-axis). Integrated  
 123 number concentrations in the size range of (a) 12 - 25 nm, (b) 25 - 90 nm, (c) 90 - 12  
 124 - 297 nm as well as (e) geometric mean diameter and (f) geometric standard deviation of  
 125 measured size distributions are shown. The time resolution for the data is 5 min. Data points are  
 126 shown in circles (blue) for indoor aerosols, and in squares (black) for outdoor aerosols. The dash  
 127 lines are for guiding the eyes.

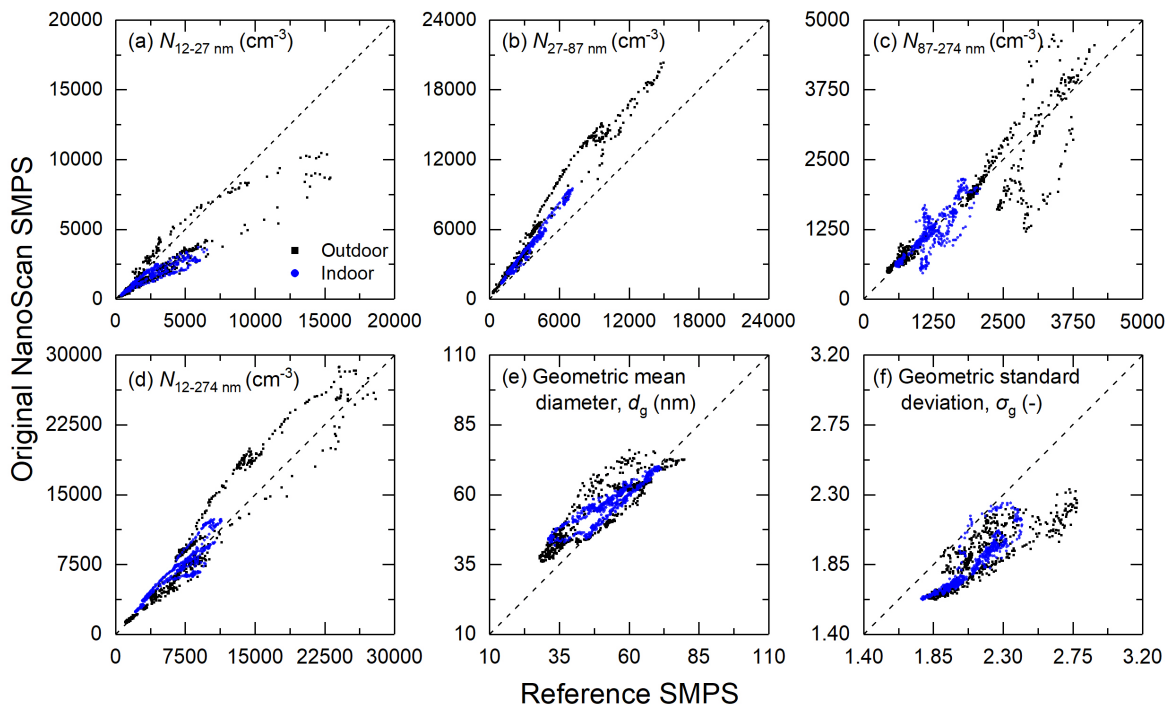

128

**Figure S7.** Comparing size distributions of outdoor and indoor aerosols for all measurement periods by the reference SMPS (x-axis) and the original NanoScan SMPS (y-axis). Integrated number concentrations in the size range of (a) 12 - 27nm, (b) 27 - 87 nm, (c) 87 - 274 nm, (d) 12 - 274 nm as well as (e) geometric mean diameter and (f) geometric standard deviation of measured size distributions are shown. The time resolution for the data is 5 min. Data points are shown in circles (blue) for indoor aerosols, and in squares (black) for outdoor aerosols. The dash lines are for guiding the eyes.

## Reference

1. F. Stratmann, T. Kauffeldt, D. Hummes and H. Fissan, Differential Electrical Mobility Analysis: A Theoretical Study, *Aerosol Sci Tech*, 1997, **26**, 368-383.
2. W. L. Li, L. Li and D. R. Chen, Technical note: A new deconvolution scheme for the retrieval of true DMA transfer function from tandem DMA data, *Aerosol Sci Tech*, 2006, **40**, 1052-1057.
3. S. H. Zhang, Y. Akutsu, L. M. Russell, R. C. Flagan and J. H. Seinfeld, Radial Differential Mobility Analyzer, *Aerosol Sci Tech*, 1995, **23**, 357-372.
4. X. T. Chen and J. Jiang, Retrieving the ion mobility ratio and aerosol charge fractions for a neutralizer in real-world applications, *Aerosol Sci Tech*, 2018, **52**, 1145-1155.
5. E. O. Knutson and K. T. Whitby, Aerosol classification by electric mobility: apparatus, theory, and applications, *J Aerosol Sci*, 1975, **6**, 443-451.
6. A. Wiedensohler, W. Birmili, A. Nowak, A. Sonntag, K. Weinhold, M. Merkel, B. Wehner, T. Tuch, S. Pfeifer, M. Fiebig, A. M. Fjaraa, E. Asmi, K. Sellegri, R. Depuy, H. Venzac, P. Villani, P. Laj, P. Aalto, J. A. Ogren, E. Swietlicki, P. Williams, P. Roldin, P. Quincey, C. Hüglin, R. Fierz-Schmidhauser, M. Gysel, E. Weingartner, F. Riccobono, S. Santos, C. Grunig, K. Faloon, D. Beddows, R. M. Harrison, C. Monahan, S. G. Jennings, C. D. O'Dowd, A. Marinoni, H. G. Horn, L. Keck, J. Jiang, J. Scheckman, P. H. McMurry, Z. Deng, C. S. Zhao, M. Moerman, B. Henzing, G. de Leeuw, G. Loschau and S. Bastian, Mobility particle size spectrometers: harmonization of technical standards and data structure to facilitate high quality long-term observations of atmospheric particle number size distributions, *Atmos Meas Tech*, 2012, **5**, 657-685.
7. D. E. Hagen and D. J. Alofs, Linear Inversion Method to Obtain Aerosol Size Distributions from Measurements with a Differential Mobility Analyzer, *Aerosol Sci Tech*, 1983, **2**, 465-475.
8. X. T. Chen, P. H. McMurry and J. Jiang, Stationary characteristics in bipolar diffusion charging of aerosols: Improving the performance of electrical mobility size spectrometers, *Aerosol Sci Tech*, 2018, **52**, 809-813.
